# Supplementary material for: One Size Does Not Fit All: Marked Heterogeneity in Incidence of and Survival from Gastric Cancer among Asian American Subgroups
Source: Oxford University Press journal article supplement (doi:10.1158/1055-9965.epi-19-1482), 2020-03-09
Supplement: 10559965epi191482-sup-233022_2_supp_6093578_q583xc.docx [file 10559965epi191482-sup-233022_2_supp_6093578_q583xc.docx]

| **Supplementary Table 1: Non-Cardiac Gastric Cancer Characteristics by Race (Males)** | | | | | | | | |
| --- | --- | --- | --- | --- | --- | --- | --- | --- |
| **Covariate** | **Frequency (%)** | | | | | | | **p Value** |
|  | **NHW (N=17,971)** | **Chinese (N=1,739)** | **Japanese (N=1,898)** | **Filipino (N=720)** | **Korean (N=1,759)** | **Vietnamese (N=665)** | **South Asian (N=257)** |  |
| Stage of diagnosis* |  |  |  |  |  |  |  | **<0.001** |
| Local | 3,653 (20.3) | 405 (23.3) | 437 (23.0) | 128 (17.8) | 561 (31.9) | 151 (22.7) | 68 (26.5) |  |
| Regional | 4,329 (24.1) | 558 (32.1) | 493 (26.0) | 206 (28.6) | 543 (30.9) | 226 (34.0) | 72 (28.0) |  |
| Distant | 5,410 (30.1) | 414 (23.8) | 408 (21.5) | 228 (31.7) | 374 (21.3) | 196 (29.5) | 66 (25.7) |  |
| Unknown Stage | 4,579 (35.5) | 362 (20.8) | 560 (29.5) | 158 (21.9) | 281 (16.0) | 92 (13.8) | 51 (19.8) |  |
| Histology** |  |  |  |  |  |  |  | **0.009** |
| Diffuse | 3,949 (22.0) | 360 (20.7) | 388 (20.4) | 186 (25.8) | 378 (21.5) | 172 (25.9) | 61 (23.7) |  |
| Non-diffuse | 14.022 (78.0) | 1,379 (79.3) | 1,510 (79.6) | 534 (74.2) | 1,381 (78.5) | 493 (74.1) | 196 (76.3) |  |
| Anatomic location |  |  |  |  |  |  |  | **<0.001** |
| Antrum | 4,731 (26.3) | 719 (41.4) | 612 (32.2) | 240 (33.3) | 760 (43.2) | 315 (47.4) | 77 (30.0) |  |
| Body | 5,188 (28.9) | 530 (30.5) | 691 (36.4) | 231 (32.0) | 538 (30.6) | 184 (27.7) | 69 (26.9) |  |
| Fundus | 1,362 (7.6) | 63 (3.6) | 74 (3.9) | 39 (5.4) | 49 (2.8) | 13 (1.8) | 18 (7.0) |  |
| Unspecified | 6,690 (37.2) | 427 (24.6) | 521 (27.5) | 210 (29.2) | 412 (23.4) | 153 (23.0) | 93 (36.2) |  |
| Surgical resection performed | 5,731 (31.9) | 914 (46.8) | 720 (37.9) | 253 (35.1) | 962 (54.7) | 352 (52.9) | 104 (40.5) | **<0.001** |
| Observed 5-year survival | 18.6% | 31.9% | 25.8% | 23.6% | 41.2% | 33.5% | 43.2% | **<0.001** |

**SUPPLEMENTARY TABLE 1:** *Defined based on National Cancer Institute-derived summary stage. **Histology codes for diffuse-type cancers are ICD-O-3 codes 8142, 8145, 8490; all other tumors were classified as non-diffuse-type. NHW, non-Hispanic White.

| **Supplementary Table 2: Non-Cardiac Gastric Cancer Characteristics by Race (Females)** | | | | | | | | |
| --- | --- | --- | --- | --- | --- | --- | --- | --- |
| **Covariate** | **Frequency (%)** | | | | | | | **p Value** |
|  | **NHW (N=15,025)** | **Chinese (N=1,346)** | **Japanese (N=1,561)** | **Filipino (N=658)** | **Korean (N=1,270)** | **Vietnamese (N=497)** | **South Asian (N=206)** |  |
| Stage of diagnosis* |  |  |  |  |  |  |  | **<0.001** |
| Local | 3,528 (23.5) | 268 (19.9) | 357 (22.9) | 123 (18.7) | 391 (30.8) | 115 (23.1) | 67 (32.5) |  |
| Regional | 3,171 (21.1) | 413 (30.7) | 459 (29.4) | 193 (29.3) | 372 (29.3) | 159 (32.0) | 48 (23.3) |  |
| Distant | 4,036 (26.9) | 372 (27.6) | 353 (22.6) | 222 (33.7) | 280 (22.1) | 141 (28.4) | 62 (30.1) |  |
| Unknown Stage | 4,290 (28.6) | 293 (21.8) | 392 (25.1) | 120 (18.2) | 227 (17.9) | 82 (16.5) | 29 (14.1) |  |
| Histology** |  |  |  |  |  |  |  | **<0.001** |
| Diffuse | 4,144 (27.6) | 483 (35.9) | 501 (32.1) | 276 (42.0) | 467 (36.8) | 189 (38.0) | 65 (31.6) |  |
| Non-diffuse | 10,881 (72.4) | 863 (64.1) | 1,060 (67.9) | 382 (58.1) | 803 (63.2) | 308 (62.0) | 141 (68.5) |  |
| Anatomic location |  |  |  |  |  |  |  | **<0.001** |
| Antrum | 4,274 (28.5) | 557 (41.4) | 587 (37.6) | 199 (30.2) | 511 (40.2) | 215 (43.3) | 53 (25.7) |  |
| Body | 4,319 (28.8) | 397 (29.5) | 502 (32.2) | 210 (31.8) | 409 (32.3) | 151 (30.4) | 63 (30.6) |  |
| Fundus | 995 (6.6) | 52 (3.9) | 45 (2.9) | 29 (4.4) | 32 (2.5) | 11 (2.2) | 14 (6.8) |  |
| Unspecified | 5,437 (36.2) | 320 (25.3) | 427 (27.4) | 220 (33.4) | 318 (25.0) | 120 (24.1) | 76 (36.9) |  |
| Surgical resection performed | 4,421 (29.4) | 618 (45.9) | 660 (42.3) | 257 (39.1) | 684 (53.9) | 229 (46.1) | 72 (35.0) |  |
| Observed 5-year survival | 22.0% | 31.7% | 29.9% | 24.9% | 41.5% | 29.2% | 42.2% | **<0.001** |

**SUPPLEMENTARY TABLE 2:** *Defined based on National Cancer Institute-derived summary stage. **Histology codes for diffuse-type cancers are ICD-O-3 codes 8142, 8145, 8490; all other tumors were classified as non-diffuse-type. NHW, non-Hispanic White.

| **Supplementary Table 3: Non-Cardiac Gastric Cancer Characteristics by Race (1990-2000)** | | | | | | | | |
| --- | --- | --- | --- | --- | --- | --- | --- | --- |
| **Covariate** | **Frequency (%)** | | | | | | | **p Value** |
|  | **NHW (N=12,257)** | **Chinese (N=979)** | **Japanese (N=1,588)** | **Filipino (N=475)** | **Korean (N=796)** | **Vietnamese (N=283)** | **South Asian (N=64)** |  |
| Stage of diagnosis* |  |  |  |  |  |  |  | **<0.001** |
| Local | 1,570 (12.8) | 151 (15.4) | 231 (14.6) | 63 (13.3) | 156 (19.6) | 43 (15.2) | ^ |  |
| Regional | 2,089 (17.0) | 219 (22.3) | 341 (21.5) | 109 (23.0) | 185 (23.2) | 86 (30.4) | ^ |  |
| Distant | 2,359 (19.3) | 187 (19.1) | 238 (15.0) | 99 (20.8) | 132 (16.6) | 49 (17.3) | ^ |  |
| Unknown Stage | 6,239 (50.9) | 422 (43.1) | 778 (49.0) | 204 (43.0) | 323 (40.6) | 105 (37.1) | ^ |  |
| Histology** |  |  |  |  |  |  |  | **<0.001** |
| Diffuse | 2,770 (22.6) | 264 (26.9) | 420 (26.5) | 161 (33.9) | 199 (25.0) | 87 (30.7) | 15 (23.4) |  |
| Non-diffuse | 9,487 (77.4) | 715 (73.0) | 1,168 (73.6) | 314 (66.1) | 597 (75.0) | 196 (69.3) | 49 (76.6) |  |
| Anatomic location |  |  |  |  |  |  |  | **<0.001** |
| Antrum | 3,391 (27.7) | 397 (40.6) | 543 (34.2) | 156 (32.8) | 355 (44.6) | 136 (48.0) | ^ |  |
| Body | 3,458 (28.2) | 282 (28.8) | 540 (34.1) | 159 (33.5) | 215 (27.0) | 78 (27.6) | ^ |  |
| Fundus | 809 (6.6) | 34 (3.5) | 59 (3.7) | 19 (4.0) | 20 (2.5) | ^ | ^ |  |
| Unspecified | 4,599 (37.5) | 266 (27.2) | 446 (28.1) | 141 (29.7) | 206 (25.9) | ^ | ^ |  |
| Surgical resection performed | 1,775 (14.5) | 225 (23.0) | 308 (19.4) | 94 (19.8) | 197 (24.8) | 72 (25.4) | ^ | **<0.001** |
| Observed 5-year survival | 15.5% | 26.7% | 26.1% | 22.7% | 34.3% | 31.1% | 23.4% | **<0.001** |

**SUPPLEMENTARY TABLE 3:** *Defined based on National Cancer Institute-derived summary stage. **Histology codes for diffuse-type cancers are ICD-O-3 codes 8142, 8145, 8490; all other tumors were classified as non-diffuse-type. ^Denotes unreported due to low cell count. NHW, non-Hispanic White.

| **Supplementary Table 4: Non-Cardiac Gastric Cancer Characteristics by Race (2001-2014)** | | | | | | | | |
| --- | --- | --- | --- | --- | --- | --- | --- | --- |
| **Covariate** | **Frequency (%)** | | | | | | | **p Value** |
|  | **NHW (N=20,739)** | **Chinese (N=2,106)** | **Japanese (N=1,871)** | **Filipino (N=903)** | **Korean (N=2,233)** | **Vietnamese (N=879)** | **South Asian (N=399)** |  |
| Stage of diagnosis* |  |  |  |  |  |  |  | **<0.001** |
| Local | 5,611 (27.1) | 522 (24.8) | 563 (30.1) | 188 (20.8) | 796 (35.7) | 223 (25.4) | 127 (31.8) |  |
| Regional | 5,411 (26.1) | 752 (35.7) | 611 (32.7) | 290 (32.1) | 730 (32.7) | 299 (34.0) | 105 (26.3) |  |
| Distant | 7,087 (34.2) | 599 (28.4) | 523 (27.9) | 351 (38.9) | 522 (23.4) | 288 (32.8) | 112 (28.0) |  |
| Unknown Stage | 2,630 (12.7) | 233 (11.1) | 174 (9.3) | 74 (8.2) | 185 (8.3) | 69 (7.9) | 55 (13.8) |  |
| Histology** |  |  |  |  |  |  |  | **<0.001** |
| Diffuse | 5,323 (25.7) | 579 (27.5) | 469 (25.1) | 301 (33.3) | 646 (28.9) | 274 (31.2) | 111 (27.8) |  |
| Non-diffuse | 15,416 (74.3) | 1,527 (72.5) | 1,402 (74.9) | 602 (66.7) | 1,587 (71.1) | 605 (68.8) | 288 (72.2) |  |
| Anatomic location |  |  |  |  |  |  |  | **<0.001** |
| Antrum | 5,614 (27.1) | 879 (41.7) | 656 (35.1) | 283 (31.3) | 916 (41.0) | 394 (44.8) | 115 (28.8) |  |
| Body | 6,049 (29.2) | 645 (30.6) | 653 (34.9) | 282 (31.2) | 732 (32.8) | 257 (29.2) | 111 (27.8) |  |
| Fundus | 1,548 (7.5) | 81 (3.9) | 60 (3.2) | 49 (5.4) | 61 (2.7) | 16 (1.8) | 29 (7.3) |  |
| Unspecified | 7,528 (36.3) | 501 (23.8) | 502 (26.8) | 289 (32.0) | 524 (23.5) | 212 (24.1) | 144 (36.1) |  |
| Surgical resection performed | 8,377 (40.4) | 1,207 (57.3) | 1,072 (57.3) | 416 (46.1) | 1,449 (64.9) | 509 (57.9) | 163 (40.9) | **<0.001** |
| Observed 5-year survival | 22.9% | 34.2% | 28.9% | 25.0% | 43.8% | 31.9% | 45.9% | **<0.001** |

**SUPPLEMENTARY TABLE 4:** *Defined based on National Cancer Institute-derived summary stage. **Histology codes for diffuse-type cancers are ICD-O-3 codes 8142, 8145, 8490; all other tumors were classified as non-diffuse-type. NHW, non-Hispanic White.

| **Supplementary Table 5: Hazard Ratios and 95% Confidence Intervals of Overall Survival, Adjusted for Insurance Status at Time of Diagnosis (2007-2014 only)** | | | | | |
| --- | --- | --- | --- | --- | --- |
| **Racial Group** | **Minimally Adjusted** | | **Fully Adjusted** | |
|  | **HR (95% CI)** | **P value** | **HR (95% CI)** | **P value** |
| NHW | 1.00 | Ref. | 1.00 | Ref. |
| Chinese | 0.73 (0.68-0.79) | **<0.001** | 0.82 (0.76-0.88) | **<0.001** |
| Japanese | 0.78 (0.72-0.84) | **<0.001** | 0.93 (0.86-1.00) | 0.06 |
| Filipino | 1.06 (0.95-1.17) | 0.3 | 1.01 (0.91-1.12) | 0.8 |
| Korean | 0.59 (0.54-0.64) | **<0.001** | 0.79 (0.73-0.86) | **<0.001** |
| Vietnamese | 0.90 (0.81-1.00) | **0.04** | 1.00 (0.90-1.19) | 0.9 |
| South Asian | 0.69 (0.58-0.82) | **<0.001** | 0.74 (0.62-0.89) | **<0.001** |

**SUPPLEMENTARY TABLE 5:** Analysis for years 2007-2014 only, when patient insurance data was available. Fully-adjusted model adjusted for stage (local, regional, distant, or unknown), histology (diffuse type), performance of surgical resection of primary tumor, county unemployment and poverty, and patient insurance at time of diagnosis. NHW, non-Hispanic White.

| **Supplementary Table 6: Hazard Ratios and 95% Confidence Intervals of Overall Survival, Restricted to Subjects with Known Tumor Location and Stage** | | | | | |
| --- | --- | --- | --- | --- | --- |
| **Racial Group** | **Minimally Adjusted** | | **Fully Adjusted** | |
|  | **HR (95% CI)** | **P value** | **HR (95% CI)** | **P value** |
| NHW | 1.00 | Ref. | 1.00 | Ref. |
| Chinese | 0.77 (0.72-0.81)) | **<0.001** | 0.82 (0.77-0.87) | **<0.001** |
| Japanese | 0.73 (0.69-0.78) | **<0.001** | 0.81 (0.76-0.86) | <0.001 |
| Filipino | 0.97 (0.89-1.05) | 0.4 | 0.94 (0.89-1.03) | 0.2 |
| Korean | 0.57 (0.54-0.61) | **<0.001** | 0.75 (0.70-0.80) | **<0.001** |
| Vietnamese | 0.81 (0.74-0.88) | **<0.001** | 0.86 (0.79-0.94) | **0.001** |
| South Asian | 0.78 (0.65-0.92) | **0.003** | 0.81 (0.68-0.95) | **0.01** |

**SUPPLEMENTARY TABLE 6:** Fully-adjusted model adjusted for stage (local, regional, distant), histology (diffuse type), performance of surgical resection of primary tumor, county unemployment and poverty.
